# Supplementary material
Source: PubMed Central journal article supplement (PMC2855745)
Supplement: NIHMS183078-supplement-1_si_001.pdf [file NIHMS183078-supplement-1_si_001.pdf]

## SUPPLEMENTAL INFORMATION

A semisynthesis platform for investigating structure-function relationships in the N-terminal domain of the anthrax lethal factor

Brad L. Pentelute<sup>†</sup>, Adam P. Barker<sup>†</sup>, Blythe E. Janowiak<sup>†</sup>, Stephen B. H. Kent<sup>‡</sup>, R. John Collier<sup>†\*</sup>

<sup>¶</sup>Department of Microbiology and Molecular Genetics, Harvard Medical School, Boston, Massachusetts 02115.

<sup>‡</sup>Department of Chemistry, University of Chicago, Chicago, IL 60637.

\*Corresponding author, [jcollier@hms.harvard.edu](mailto:jcollier@hms.harvard.edu).

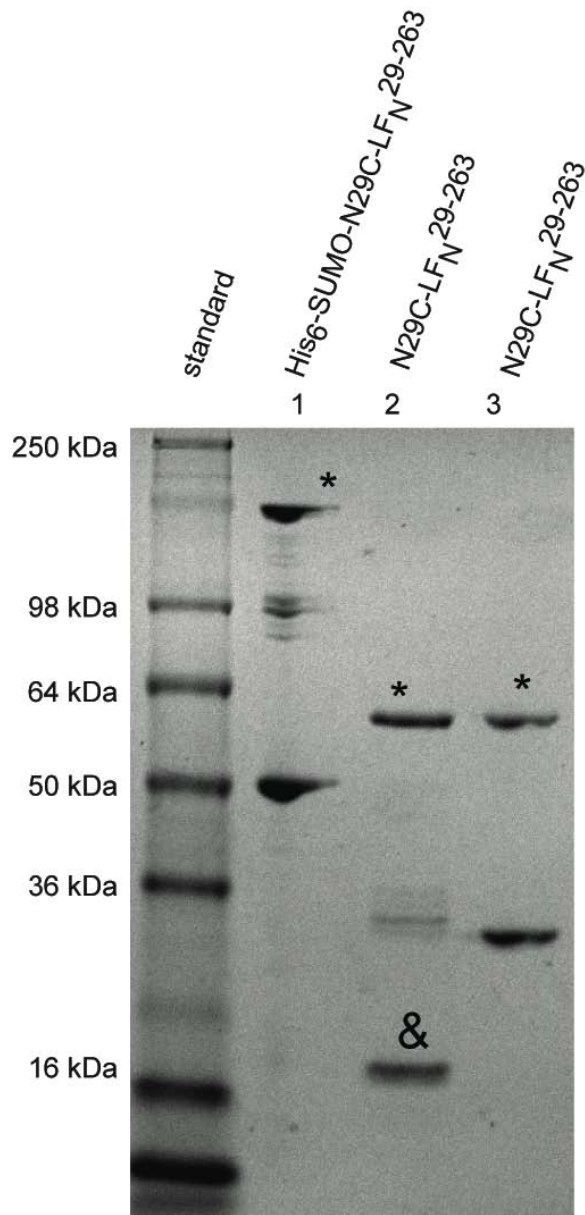

**Figure S1.** SDS-PAGE analysis of the purification of N29C-LF<sub>N</sub><sup>29-263</sup> on a 4-12% Tris Glycine gel. Lane 1, His<sub>6</sub>-SUMO-N29C-LF<sub>N</sub><sup>29-263</sup>; Lane 2, crude SUMO protease cleavage reaction products after overnight incubation; Lane 3, purified final product N29C-LF<sub>N</sub><sup>29-263</sup>. (\* = disulfide, & = SUMO)

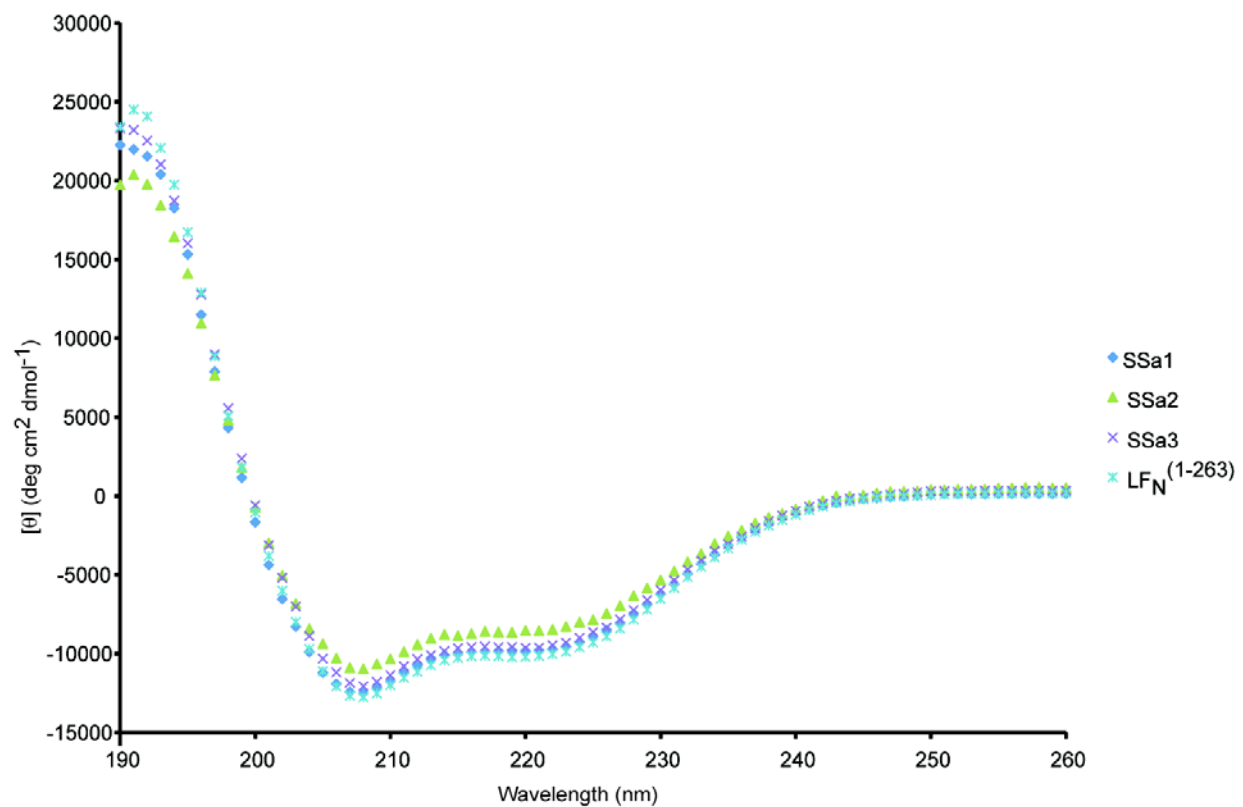

**Figure S2.** Far-UV CD spectra of semisynthetic LFN analogues SSa1, SSa2, SSa3 and recombinant LFN<sup>1-263</sup>. CD spectra were recorded on an Jasco J-815 instrument at room temperature in pH = 8.5 buffer containing 5 mM TRIS and 50 mM Na<sub>2</sub>SO<sub>4</sub>. A 1 mm path length cell was used.

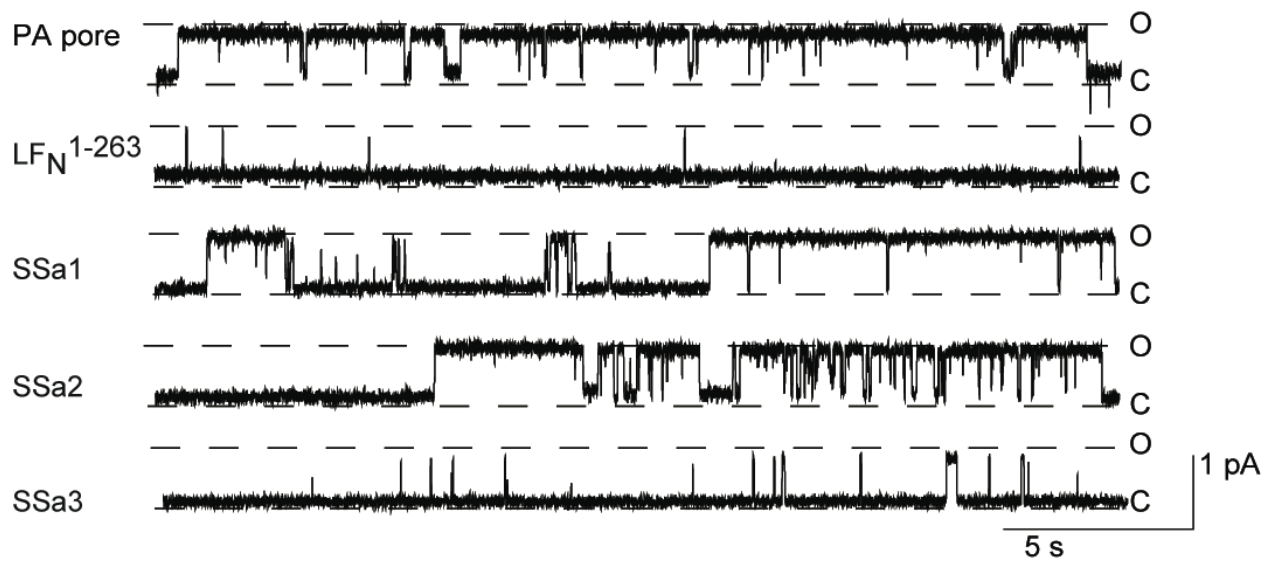

**Figure S3.** Single PA pore planar phospholipid bilayer characterization of LF<sub>N</sub> analogues under an applied membrane potential of 20 mV. The single-channel measurements were obtained under the same conditions used for macroscopic current recordings, except we added ~0.1 ng of PA prepore. “C” and “O” specify the closed and open states of the channel.
